# Supplementary material for: Fate induction in CD8 CAR T cells through asymmetric cell division
Source: PubMed Central journal article supplement — Nature. 2024 Aug 28;633(8030):670–7. doi: 10.1038/s41586-024-07862-7 (PMC11410665; doi:10.1038/s41586-024-07862-7), 2024-08-28

**Supplementary information**

---

**Fate induction in CD8 CAR T cells through asymmetric cell division**

---

In the format provided by the authors and unedited

Ext. Data Figure 11c

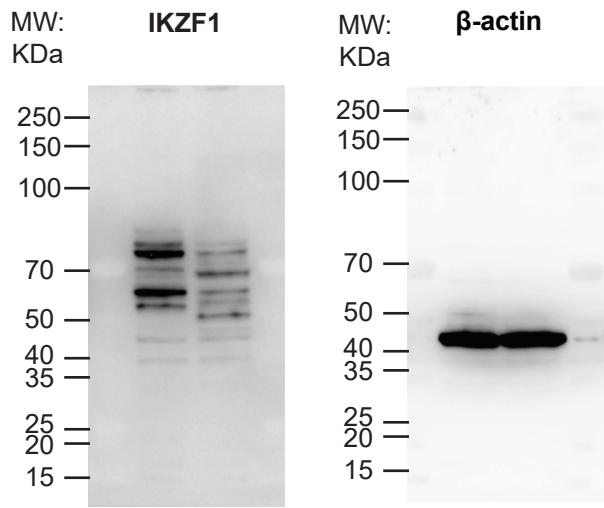

Ext. Data Figure 11f

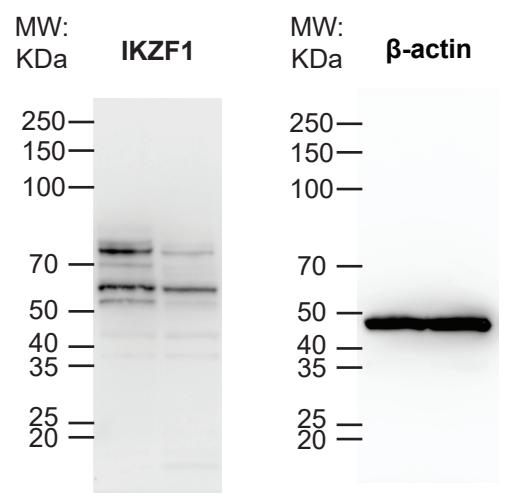

Supplement: 41586_2024_7862_MOESM1_ESM.pdf [file 41586_2024_7862_MOESM1_ESM.pdf]
