# Supplementary material for: Fate induction in CD8 CAR T cells through asymmetric cell division
Source: PubMed Central journal article supplement — Nature. 2024 Aug 28;633(8030):670–7. doi: 10.1038/s41586-024-07862-7 (PMC11410665; doi:10.1038/s41586-024-07862-7), 2024-08-28
Supplement: 41586_2024_7862_MOESM2_ESM.pdf [file 41586_2024_7862_MOESM2_ESM.pdf]

## Reporting Summary

Nature Portfolio wishes to improve the reproducibility of the work that we publish. This form provides structure for consistency and transparency in reporting. For further information on Nature Portfolio policies, see our [Editorial Policies](#) and the [Editorial Policy Checklist](#).

### Statistics

For all statistical analyses, confirm that the following items are present in the figure legend, table legend, main text, or Methods section.

- | n/a                                 | Confirmed                                                                                                                                                                                                                                                                                      |
|-------------------------------------|------------------------------------------------------------------------------------------------------------------------------------------------------------------------------------------------------------------------------------------------------------------------------------------------|
| <input type="checkbox"/>            | <input checked="" type="checkbox"/> The exact sample size ( $n$ ) for each experimental group/condition, given as a discrete number and unit of measurement                                                                                                                                    |
| <input type="checkbox"/>            | <input checked="" type="checkbox"/> A statement on whether measurements were taken from distinct samples or whether the same sample was measured repeatedly                                                                                                                                    |
| <input type="checkbox"/>            | <input checked="" type="checkbox"/> The statistical test(s) used AND whether they are one- or two-sided<br><i>Only common tests should be described solely by name; describe more complex techniques in the Methods section.</i>                                                               |
| <input checked="" type="checkbox"/> | <input type="checkbox"/> A description of all covariates tested                                                                                                                                                                                                                                |
| <input type="checkbox"/>            | <input checked="" type="checkbox"/> A description of any assumptions or corrections, such as tests of normality and adjustment for multiple comparisons                                                                                                                                        |
| <input type="checkbox"/>            | <input checked="" type="checkbox"/> A full description of the statistical parameters including central tendency (e.g. means) or other basic estimates (e.g. regression coefficient) AND variation (e.g. standard deviation) or associated estimates of uncertainty (e.g. confidence intervals) |
| <input type="checkbox"/>            | <input checked="" type="checkbox"/> For null hypothesis testing, the test statistic (e.g. $F$ , $t$ , $r$ ) with confidence intervals, effect sizes, degrees of freedom and $P$ value noted<br><i>Give <math>P</math> values as exact values whenever suitable.</i>                            |
| <input checked="" type="checkbox"/> | <input type="checkbox"/> For Bayesian analysis, information on the choice of priors and Markov chain Monte Carlo settings                                                                                                                                                                      |
| <input checked="" type="checkbox"/> | <input type="checkbox"/> For hierarchical and complex designs, identification of the appropriate level for tests and full reporting of outcomes                                                                                                                                                |
| <input checked="" type="checkbox"/> | <input type="checkbox"/> Estimates of effect sizes (e.g. Cohen's $d$ , Pearson's $r$ ), indicating how they were calculated                                                                                                                                                                    |

*Our web collection on [statistics for biologists](#) contains articles on many of the points above.*

### Software and code

Policy information about [availability of computer code](#)

Data collection BD FACSDiva software v8.0.1(LSRII, Fortessa, A3 Lite, and ArialI) for flow cytometry data. Gen5 3.04 for in vitro killing assay data. Living Image 4.4 (PerkinElmer) for bioluminescence flux data. Zen 2.5 (blue edition, Zeiss) software for microscopy data.

Data analysis FlowJo v10.8.1 for flow cytometry data. Living Image 4.4 (PerkinElmer) for bioluminescence flux data. Statistical analyses were performed using GraphPad Prism (v9.4.0).  
For single cell analysis, fastq files were analyzed with Cell Ranger v6.1.2.  
No custom code was created for this study.  
The code used was deposited to Zenodo (10.5281/zenodo.11672288).

For analysis performed in R, we used the following packages:  
#R version 4.3.1 (2023-06-16)  
#Platform: aarch64-apple-darwin20 (64-bit)  
#Running under: macOS Monterey 12.6.2  
#Matrix products: default  
#BLAS: /System/Library/Frameworks/Accelerate.framework/Versions/A/Frameworks/vecLib.framework/Versions/A/libBLAS.dylib  
#LAPACK: /Library/Frameworks/R.framework/Versions/4.3-arm64/Resources/lib/libRlapack.dylib; LAPACK version 3.11.0  
#locale:  
# [1] en\_US.UTF-8/en\_US.UTF-8/en\_US.UTF-8/C/en\_US.UTF-8/en\_US.UTF-8  
#time zone: America/New\_York  
#tzcode source: internal

```

#attached base packages:
# [1] stats4 grid stats graphics grDevices utils datasets methods base

#other attached packages:
# [1] ggplot2_3.4.1 RColorBrewer_1.1-3 DropletUtils_1.20.0
# [4] SingleCellExperiment_1.24.0 SummarizedExperiment_1.32.0 Biobase_2.62.0
# [7] GenomicRanges_1.54.1 GenomeInfoDb_1.38.5 IRanges_2.36.0
# [10] S4Vectors_0.40.2 BiocGenerics_0.48.1 MatrixGenerics_1.14.0
# [13] matrixStats_1.3.0 glmGamPoi_1.14.0 gridExtra_2.3
# [16] EnhancedVolcano_1.18.0 ggrepel_0.9.5 sctransform_0.4.1
# [19] dplyr_1.1.4 cowplot_1.1.3 fgsea_1.26.0
# [22] patchwork_1.2.0 ggplot2_3.5.1 SeuratObject_5.0.2
# [25] Seurat_4.4.0 rlang_1.1.3 irlba_2.3.5.1
# [28] Matrix_1.6-5

#loaded via a namespace (and not attached):
# [1] RcppAnnoy_0.0.22 splines_4.3.1 later_1.3.2
# [4] bitops_1.0-7 R.oo_1.26.0 tibble_3.2.1
# [7] polyclip_1.10-6 lifecycle_1.0.4 edgeR_3.42.4
# [10] globals_0.16.3 lattice_0.22-6 MASS_7.3-60.0.1
# [13] magrittr_2.0.3 limma_3.56.2 plotly_4.10.4
# [16] remotes_2.5.0 httpuv_1.6.15 spam_2.10-0
# [19] sp_2.1-4 sessioninfo_1.2.2 pkgbuild_1.4.4
# [22] spatstat.sparse_3.0-3 reticulate_1.37.0 pbapply_1.7-2
# [25] abind_1.4-5 pkgload_1.3.4 zlibbioc_1.48.0
# [28] Rtsne_0.17 purrr_1.0.2 R.utils_2.12.3
# [31] RCurl_1.98-1.14 GenomeInfoDbData_1.2.11 listenv_0.9.1
# [34] spatstat.utils_3.0-4.001 goftest_1.2-3 dqrng_0.4.1
# [37] spatstat.random_3.2-3 fitdistrplus_1.1-11 parallelly_1.37.1
# [40] DelayedMatrixStats_1.24.0 leiden_0.4.3.1 codetools_0.2-19
# [43] DelayedArray_0.28.0 scuttle_1.10.3 tidyselect_1.2.1
# [46] farver_2.1.2 spatstat.explore_3.2-7 jsonlite_1.8.8
# [49] ellipsis_0.3.2 progressr_0.14.0 ggridges_0.5.6
# [52] survival_3.5-8 tools_4.3.1 ica_1.0-3
# [55] Rcpp_1.0.12 glue_1.7.0 SparseArray_1.2.3
# [58] usethis_2.2.3 HDF5Array_1.30.0 withr_3.0.0
# [61] fastmap_1.2.0 rhdf5filters_1.14.1 fansi_1.0.6
# [64] digest_0.6.35 R6_2.5.1 mime_0.12
# [67] colorspace_2.1-0 scattermore_1.2 tensor_1.5
# [70] spatstat.data_3.0-4 R.methodsS3_1.8.2 utf8_1.2.4
# [73] tidyr_1.3.1 generics_0.1.3 data.table_1.15.4
# [76] httr_1.4.7 htmlwidgets_1.6.4 S4Arrays_1.2.0
# [79] uwot_0.2.2 pkgconfig_2.0.3 gtable_0.3.5
# [82] lmtest_0.9-40 XVector_0.42.0 htmltools_0.5.8.1
# [85] profvis_0.3.8 dotCall64_1.1-1 scales_1.3.0
# [88] png_0.1-8 rstudioapi_0.15.0 reshape2_1.4.4
# [91] nlme_3.1-164 cachem_1.1.0 zoo_1.8-12
# [94] rhdf5_2.46.0 stringr_1.5.1 KernSmooth_2.23-22
# [97] parallel_4.3.1 miniUI_0.1.1.1 pillar_1.9.0
# [100] vctr_0.6.5 RANN_2.6.1 urlchecker_1.0.1
# [103] promises_1.3.0 beachmat_2.18.0 xtable_1.8-4
# [106] cluster_2.1.6 locfit_1.5-9.9 cli_3.6.2
# [109] compiler_4.3.1 crayon_1.5.2 future.apply_1.11.2
# [112] labeling_0.4.3 plyr_1.8.9 fs_1.6.4
# [115] stringi_1.8.4 viridisLite_0.4.2 deldir_2.0-4
# [118] BiocParallel_1.36.0 munsell_0.5.1 lazyeval_0.2.2
# [121] devtools_2.4.5 spatstat.geom_3.2-9 sparseMatrixStats_1.14.0
# [124] future_1.33.2 Rhdf5lib_1.24.0 shiny_1.8.1.1
# [127] ROCR_1.0-11 igraph_2.0.3 memoise_2.0.1
# [130] fastmatch_1.1-4

```

For code used in python (pyscenic analysis), we used the following packages:

```

-----
anndata 0.8.0
scanpy 1.7.2
sinfo 0.3.1
-----
MulticoreTSNE NA
PIL 9.1.0
anndata 0.8.0
anyio NA
appnope 0.1.3
arrow 1.2.3
attr 21.4.0
babel 2.14.0
backcall 0.2.0

```

```

beta_ufunc      NA
binom_ufunc     NA
bottleneck      1.3.4
brotli          NA
cached_property 1.5.2
certifi         2021.10.08
cffi            1.15.0
charset_normalizer 2.0.12
cloudpickle     2.0.0
colorama        0.4.4
cyclor          0.10.0
cython_runtime  NA
cytoolz         0.11.0
dask            2022.02.0
dateutil        2.8.2
debugpy         1.6.0
decorator        5.1.1
defusedxml      0.7.1
dunamai         1.11.1
entrypoints     0.4
fastjsonschema  NA
fqdn            NA
fsspec          2022.3.0
get_version     3.5.4
h5py            3.6.0
idna            3.3
igraph          0.9.10
importlib_resources NA
ipykernel       6.16.2
ipython_genutils 0.2.0
isoduration     NA
jedi            0.18.1
jinja2          3.1.1
joblib          1.1.0
json5           NA
jsonpointer     2.4
jsonschema      4.17.3
jupyter_server  1.24.0
jupyterlab_server 2.24.0
kiwisolver      1.4.2
legacy_api_wrap 0.0.0
llvmlite        0.38.0
loompy          3.0.7
louvain         0.7.1
markupsafe      2.1.1
matplotlib      3.5.1
matplotlib_inline NA
mpl_toolkits    NA
natsort         8.1.0
nbformat        5.3.0
nbinom_ufunc    NA
numba           0.55.1
numexpr         2.8.0
numpy           1.21.6
numpy_groupies  0.9.14
packaging       21.3
pandas          1.3.4
parso           0.8.3
pexpect         4.8.0
pickleshare     0.7.5
pkg_resources   NA
prometheus_client NA
prompt_toolkit  3.0.39
psutil          5.9.0
ptyprocess      0.7.0
pvectorc        NA
pyarrow         0.16.0
pyparser        2.21
pydev_ipython   NA
pydevconsole    NA
pydevd          2.8.0
pydevd_file_utils NA
pydevd_plugins  NA
pydevd_tracing  NA
pygments        2.11.2
pyparsing       3.0.8

```

```

pyrsistent      NA
pyscenic        0.11.2
pytz             2022.1
requests        2.31.0
rfc3339_validator 0.1.4
rfc3986_validator 0.1.1
scanpy          1.7.2
scipy           1.7.3
send2trash      NA
setuptools      62.1.0
setuptools_scm  NA
sinfo           0.3.1
six             1.16.0
sklearn         1.0.2
sniffio         1.3.1
socks           1.7.1
sphinxcontrib   NA
storemagic      NA
tables          3.7.0
tblib           1.7.0
terminado       0.13.3
texttable       1.6.4
threadpoolctl   3.1.0
tlz             0.11.0
toolz           0.11.1
tornado         6.1
traitlets       5.9.0
typing_extensions NA
unicodedata2    NA
uri_template    NA
urllib3         1.26.9
wcwidth         0.2.5
webcolors       1.13
websocket       1.6.1
yaml            6.0
zipp            NA
zmq             22.3.0
-----
IPython         7.32.0
jupyter_client  7.2.2
jupyter_core    4.12.0
jupyterlab     3.6.7
notebook       6.4.10
-----
Python 3.7.12 | packaged by conda-forge | (default, Oct 26 2021, 05:59:23) [Clang 11.1.0 ]
Darwin-21.6.0-x86_64-i386-64bit
10 logical CPU cores, i386

For python analysis of RNA velocity, the following packages were used:
-----
anndata 0.8.0
scanpy 1.8.2
sinfo 0.3.1
-----
PIL 9.0.1
anndata 0.8.0
appnope 0.1.2
asttokens NA
backcall 0.2.0
beta_ufunc NA
binom_ufunc NA
cellrank 1.5.1
cffi 1.15.0
colorama 0.4.4
cyclcr 0.10.0
cython_runtime NA
dateutil 2.8.2
debugpy 1.5.1
decorator 5.1.1
defusedxml 0.7.1
docrep 0.3.2
entrypoints 0.4
executing 0.8.3
h5py 3.6.0
hypergeom_ufunc NA
igraph 0.10.0

```

```

ipykernel          6.9.2
ipython_genutils  0.2.0
jedi                0.18.1
joblib             1.1.0
kiwisolver        1.4.0
llvmlite          0.38.0
louvain           0.7.1
matplotlib        3.5.1
matplotlib_inline NA
mpl_toolkits      NA
natsort           8.1.0
nbinom_ufunc      NA
numba             0.55.1
numexpr          2.8.0
numpy            1.21.5
packaging         21.3
pandas           1.4.1
parso            0.8.3
petsc4py         3.16.5
pexpect          4.8.0
pickleshare      0.7.5
pkg_resources     NA
progressbar      4.0.0
prompt_toolkit   3.0.27
psutil           5.9.0
ptyprocess       0.7.0
pure_eval        0.2.2
pydev_ipython    NA
pydevconsole     NA
pydevd           2.6.0
pydevd_concurrency_analyser NA
pydevd_file_utils NA
pydevd_plugins   NA
pydevd_tracing   NA
pygam            0.8.0
pygments         2.11.2
pygpcca          1.0.3
pyparsing        3.0.7
python_utils     NA
pytz             2022.1
scanpy           1.8.2
scipy            1.8.0
scvelo           0.2.4
seaborn          0.11.2
setuptools       60.10.0
sinfo            0.3.1
six              1.16.0
sklearn          1.0.2
slepc4py         3.16.1
sphinxcontrib    NA
stack_data       0.2.0
statsmodels      0.13.2
tables           3.7.0
texttable        1.6.4
threadpoolctl    3.1.0
tornado          6.1
tqdm             4.63.1
traitlets        5.1.1
typing_extensions NA
wcwidth          0.2.5
wrapit           1.14.0
zipp             NA
zmq              22.3.0
-----
IPython          8.1.1
jupyter_client   7.1.2
jupyter_core     4.9.2
notebook         6.4.10
-----
Python 3.10.4 | packaged by conda-forge | (main, Mar 24 2022, 17:45:10) [Clang 12.0.1 ]
macOS-12.6.2-x86_64-i386-64bit
10 logical CPU cores, i386

```

For manuscripts utilizing custom algorithms or software that are central to the research but not yet described in published literature, software must be made available to editors and reviewers. We strongly encourage code deposition in a community repository (e.g. GitHub). See the Nature Portfolio [guidelines for submitting code & software](#) for further information.

## Data

Policy information about [availability of data](#)

All manuscripts must include a [data availability statement](#). This statement should provide the following information, where applicable:

- Accession codes, unique identifiers, or web links for publicly available datasets
- A description of any restrictions on data availability
- For clinical datasets or third party data, please ensure that the statement adheres to our [policy](#)

Sequencing data have been deposited on GEO with accession number GSE268878. The reference genome for single cell RNA sequencing analysis is Human (GRCh38) 2020-A, Human (GRCh38) v5.0.0.

## Human research participants

Policy information about [studies involving human research participants and Sex and Gender in Research](#).

|                             |                                                                                                                                                                                                                                                                                                |
|-----------------------------|------------------------------------------------------------------------------------------------------------------------------------------------------------------------------------------------------------------------------------------------------------------------------------------------|
| Reporting on sex and gender | Healthy human donors of male and female sexes were used in this study. Sex was determined by self reporting information collected by the Penn Human Immunology Core. Study was not designed to detect differences between sexes.                                                               |
| Population characteristics  | T cells were isolated from healthy human donors by the Penn Human Immunology Core.                                                                                                                                                                                                             |
| Recruitment                 | Apheresis product was collected from healthy human donors by the Penn Human Immunology Core. Samples were used without any selection                                                                                                                                                           |
| Ethics oversight            | All human studies were in compliance with the Declaration of Helsinki. Apheresis donors were recruited by the Penn Human Immunology Core, which maintains the IRB protocols at the University of Pennsylvania necessary for human cell procurement and distribution of de-identified reagents. |

Note that full information on the approval of the study protocol must also be provided in the manuscript.

## Field-specific reporting

Please select the one below that is the best fit for your research. If you are not sure, read the appropriate sections before making your selection.

Life sciences       Behavioural & social sciences       Ecological, evolutionary & environmental sciences

For a reference copy of the document with all sections, see [nature.com/documents/nr-reporting-summary-flat.pdf](https://www.nature.com/documents/nr-reporting-summary-flat.pdf)

## Life sciences study design

All studies must disclose on these points even when the disclosure is negative.

|                 |                                                                                                                                                                                                                                                                                                                                                                                                                                                         |
|-----------------|---------------------------------------------------------------------------------------------------------------------------------------------------------------------------------------------------------------------------------------------------------------------------------------------------------------------------------------------------------------------------------------------------------------------------------------------------------|
| Sample size     | Sample sizes were not predetermined based on statistical methods, but were chosen based on preliminary data and previously published results. We performed at least three independent experiments for flow cytometry, in vitro cytotoxicity, and real-time metabolic assay experiments; 5-8 NSG mice per treatment group; and 2 independent single-cell profiling experiments. Sample size is stated in each caption.                                   |
| Data exclusions | Negative OCR values in the real-time metabolic assay was set to zero, as negative values do not represent biological meaning and are appreciated to be technical artifacts when studying $1.5 \times 10^5$ T cells per well. Bioluminescence outliers were removed from plotting but included in source data.                                                                                                                                           |
| Replication     | Reported results were replicated across multiple experiments with all replicates generating consistent results. The number of replicates for each experiment are detailed in the figure legends.                                                                                                                                                                                                                                                        |
| Randomization   | For all in vivo experiments, treatment groups were randomly selected by the cage number. Randomization was not required for in vitro experiments as each experimental condition was controlled within each T cell donor (e.g. proximal and distal daughter cells from the same donor).                                                                                                                                                                  |
| Blinding        | In vivo injections were performed in a blinded fashion by a member of the Ellebrecht or Payne laboratories or a staff member of the Human Stem Cell and Xenograft Core of the University of Pennsylvania. For all in vitro experiments, data collection was not blinded, however, data were obtained with objective methodologies (sequencing, flow cytometry). Fully blinded in vitro experiments were not possible due to limited staff availability. |

## Reporting for specific materials, systems and methods

We require information from authors about some types of materials, experimental systems and methods used in many studies. Here, indicate whether each material, system or method listed is relevant to your study. If you are not sure if a list item applies to your research, read the appropriate section before selecting a response.

## Materials & experimental systems

- |                                     |                                     |                               |
|-------------------------------------|-------------------------------------|-------------------------------|
| n/a                                 | <input type="checkbox"/>            | Involved in the study         |
| <input type="checkbox"/>            | <input checked="" type="checkbox"/> | Antibodies                    |
| <input type="checkbox"/>            | <input checked="" type="checkbox"/> | Eukaryotic cell lines         |
| <input checked="" type="checkbox"/> | <input type="checkbox"/>            | Palaeontology and archaeology |
| <input type="checkbox"/>            | <input checked="" type="checkbox"/> | Animals and other organisms   |
| <input checked="" type="checkbox"/> | <input type="checkbox"/>            | Clinical data                 |
| <input checked="" type="checkbox"/> | <input type="checkbox"/>            | Dual use research of concern  |

## Methods

- |                                     |                                     |                        |
|-------------------------------------|-------------------------------------|------------------------|
| n/a                                 | <input type="checkbox"/>            | Involved in the study  |
| <input checked="" type="checkbox"/> | <input type="checkbox"/>            | ChIP-seq               |
| <input type="checkbox"/>            | <input checked="" type="checkbox"/> | Flow cytometry         |
| <input checked="" type="checkbox"/> | <input type="checkbox"/>            | MRI-based neuroimaging |

## Antibodies

### Antibodies used

Unless otherwise specified, antibodies were purchased from BioLegend.

LIPSTIC assay populations were sorted and subsequently phenotyped by staining with CD8-APCH7 (SK1, BD Biosciences, 561423), CD4-BUV805 (SK3, BD Biosciences, 612887), CCR7-APC/Cy7 (G043H7, 353212), CD45RA-BV650 (HI100, 304136), CD45RA-BUV395 (HI100, BD Biosciences, 740298), CD45RO (UCHL1, 304234), CD25-BV711 (M-A251, 356138), CD62L-PE (DREG-56, 304840), and/or CD62L-BV605 (DREG-56, 304834).

For in vivo studies, samples were stained with CD8-APC/Cy5.5 (RFT8, SouthernBiotech 9536-18), CD4-PE/Cy5.5 (RFT4, SouthernBiotech 9522-16), CD3-BV605 (OKT3, 317322), CD19-APC (HIB19, 302212), CD45RA-BUV395 (HI100, 740298), CD45RO-BV785 (UCHL1, 304234), and CD45-PECy7 (QA17A19, 393408).

The following antibodies were used for western blots: rabbit anti-Ikaros (IKZF1) monoclonal antibody (Cell Signaling, 90345), digital anti-rabbit-HRP (Kindle Biosciences, LLC, R1006), mouse anti- $\beta$ -actin monoclonal antibody (Cell Signaling, 37005), and digital anti-mouse-HRP (Kindle Biosciences, LLC, R1005).

The pre-mixed totalseq C human super panel cocktail by Biolegend was used (cat# 900000114, lot# B311489). The dilution and concentration of each antibody in this cocktail is proprietary information owned by Biolegend and not available to us. The following clones are included in the panel (along with their DNA barcode):

The order of the following lines is as follows: id of antibody - Clone name - target specificity - DNA sequence

C0005 2D10 CD80 ACGAATCAATCTGTG  
 C0006 IT2.2 CD86 GTCITTTGTCAAGTGCA  
 C0007 29E.2A3 CD274B7-H1PD-L1 GTTGTCGACAATAC  
 C0008 24F.10C12 CD273B7-DCPD-L2 TCAACGCTTGGCTAG  
 C0009 2D3 CD275B7-H2ICOSL GTGCATTCAACAGTA  
 C0020 122 CD270HVEMTR2 TGATAGAAACAGACC  
 C0021 11C3.1 CD252OX40L TTTAGTGATCCGACT  
 C0022 5F4 CD137L4-1BBLigand ATTCGCCTTACGCAA  
 C0023 SKII.4 CD155PVR ATCACATCGTTGCCA  
 C0024 TX31 CD112Nectin-2 AACCTCCGTCTAAG  
 C0026 CC2C6 CD47 GCATTCTGTCACTA  
 C0027 113-16 CD70 CGCGAACATAAGAAG  
 C0028 BY88 CD30 TCAGGGTGTGCTGTA  
 C0029 BJ40 CD48 CTACGACGTAGAAGA  
 C0031 5C3 CD40 CTAGATGGAGTATG  
 C0032 24-31 CD154 GCTAGATAGATGCAA  
 C0033 HI186 CD52 CTTTGTACGAGCAA  
 C0034 UCHT1 CD3 CTATTGTAACCTCT  
 C0046 SK1 CD8 GCGCAACTTGATGAT  
 C0047 5.1H11 CD56 TCCTTTCCTGATAGG  
 C0050 HIB19 CD19 CTGGGCAATTACTCG  
 C0052 P67.6 CD33 TAACTCAGGGCCTAT  
 C0053 S-HCL-3 CD11c TACGCCTATAACTTG  
 C0054 581 CD34 GCAGAAATCTCCCTT  
 C0056 19F2 CD269BCMA CAGATGATCCACCAT  
 C0058 W6/32 HLA-ABC TATGCGAGGCTTATC  
 C0061 104D2 CD117c-kit AGACTAATAGCTGAC  
 C0062 HI10a CD10 CAGCCATTCATTAGG  
 C0063 HI100 CD45RA TCAATCCTCCGCTT  
 C0064 6H6 CD123 CTCTACTCTGTACAGG  
 C0066 CD7-6B7 CD7 TGGATCCCGGACTT  
 C0068 43A3 CD105 ATCGTCGAGAGCTAG  
 C0069 RCR-401 CD201EPCR GTTTCCTTGACCAAG  
 C0070 GoH3 mouseCD49f TTCCGAGGATGATCT  
 C0071 L291H4 CD194CCR4 AGCTTACCTGCACGA  
 C0072 RPA-T4 CD4 TGTTCCCGCTCAACT  
 C0073 IM7 CD44 TGGCTTCAGGTCCTA  
 C0081 M5E2 CD14 TCTCAGACCTCCGTA  
 C0083 3G8 CD16 AAGTTCCTCTTTGC  
 C0085 BC96 CD25 TTTGTCCTGTACGCC  
 C0087 UCHL1 CD45RO CTCCGAATCATGTTG

C0088 EH12.2H7 CD279 ACAGGCCGTATTTA  
 C0089 A15153G TIGITVSTM3 TTGCTTACCGCCAGA  
 C0090 MOPC-21 MouseIlgG1kappaisotypeCtrl GCCGGACGACATTAA  
 C0091 MOPC-173 MouseIlgG2akappaisotypeCtrl CTCCTACCTAAACTG  
 C0092 H1.2F3 MouseIlgG2bkappaisotypeCtrl ATATGTATCACGCGA  
 C0095 RTK4530 RatIlgG2bkappaisotypeCtrl GATTCTTGACGACCT  
 C0100 2H7 CD20 TTCTGGGTCCCTAGA  
 C0101 900 CD335NKp46 ACAATTTGAACAGCG  
 C0102 BM16 CD294CRTH2 TGTTTACGAGAGCCG  
 C0103 RA3-6B2 CD45R/B220 CCTACACCTCATAAT  
 C0123 9C4 CD326Ep-CAM TTCCGAGCAAGTATC  
 C0124 WM59 CD31 ACCTTTATGCCACGG  
 C0127 NC-08 Podoplanin GGTACTCGTTGTGT  
 C0128 16A1 CD140aPDGFRalpha ATGCGCCGAGAATTA  
 C0129 18A2 CD140bPDGFRbeta CAATGGTTCACTGCC  
 C0132 AY13 EGFR GCTTAACATTGGCAC  
 C0134 P1H12 CD146 CCTTGGATAACATCA  
 C0135 67A4 CD324E-Cadherin ATCCTTCTCCCTTTC  
 C0136 MHM-88 IgM TAGCGAGCCCGTATA  
 C0138 UCHT2 CD5 CATTAAACGGGATGCC  
 C0139 B1 TCRdeltagamma CTTCCGATTCATTCA  
 C0140 G025H7 CD183CXCR3 GCGATGGTAGATTAT  
 C0141 J418F1 CD195CCR5 CCAAAGTAAGAGCCA  
 C0142 FUN-2 CD32 GCTTCCGAATTACCG  
 C0143 G034E3 CD196CCR6 GATCCCTTTGTCACT  
 C0144 J252D4 CD185CXCR5 AATTCAACCGTCGCC  
 C0145 Ber-ACT8 CD103IntegrinalphaE GACCTCATTGTGAAT  
 C0146 FN50 CD69 GTCTCTTGGCTTAAA  
 C0147 DREG-56 CD62L GTCCTGCAACTTGA  
 C0148 G043H7 CD197CCR7 AGTTCAGTCAACCGA  
 C0149 HP-3G10 CD161 GTACGCAGTCCTTCT  
 C0151 BNI3 CD152CTLA-4 ATGGTTCACGTAATC  
 C0152 11C3C65 CD223LAG-3 CATTGTCTGCCGGT  
 C0153 SA231A2 KLRG1MAFA CTTATTTCTGCCCT  
 C0154 O323 CD27 GCACTCCTGCATGTA  
 C0155 H4A3 CD107aLAMP-1 CAGCCCACTGCAATA  
 C0156 DX2 CD95Fas CCAGCTCATTAGAGC  
 C0158 Ber-ACT35 (ACT35) CD134OX40 AACCCACCGTTGTTA  
 C0159 L243 HLA-DR AATAGCGAGCAAGTA  
 C0160 L161 CD1c GAGTACTTCACTCG  
 C0161 ICRF44 CD11b GACAAGTGATCTGCA  
 C0162 10.1 CD64 AAGTATGCCCTACGA  
 C0163 M80 CD141Thrombomodulin GGATAACCGCGCTTT  
 C0164 51.1 CD1d TCGAGTCGCTTATCA  
 C0165 1D11 CD314NKG2D CGTGTGTTGTTCTCA  
 C0166 6/40c CD66b AGCTGTAAGTTTCGG  
 C0167 E11 CD35 ACTTCCGTCGATCTT  
 C0168 QA17A04 CD57Recombinant AACTCCCTATGGAGG  
 C0169 F38-2E2 CD366Tim-3 TGTCTACCCAATT  
 C0170 MIH26 CD272BTLA GTTATTGGACTAAGG  
 C0171 C398.4A CD278ICOS CGCGCACCCATTAATA  
 C0174 TS2/9 CD58LFA-3 GTTCCTATGGACGAC  
 C0175 NK92.39 CD96TACTILE TGGCCTATAAATGGT  
 C0176 A1 CD39 TTACCTGGTATCCGT  
 C0177 NOK-1 CD178Fas-L CCGGTCCTCTGTATT  
 C0179 K0124E1 CX3CR1 AGTATCGTCTCTGGG  
 C0180 ML5 CD24 AGATTCCTTCGTGTT  
 C0181 Bu32 CD21 AACCTAGTAGTTCGG  
 C0185 TS2/4 CD11a TATATCCTTGTGAGC  
 C0187 CB3-1 CD79bigB ATTCTTCAACCGAAG  
 C0188 ASL-32 CD66ace GGGACAGTTCGTTTC  
 C0189 C1.7 CD2442B4 TCGCTTGGATGGTAG  
 C0196 HIR2 CD235ab GCTCCTTACACGTA  
 C0205 15-2 CD206MMR TCAGAACGTCTAACT  
 C0206 7-239 CD169SialoadhesinSiglec-1 TACTCAGCGTGTGTTG  
 C0207 8F9 CD370CLEC9ADNGR1 CTGCATTTCAAGTAAG  
 C0208 S15046E XCR1 AAGACGCATGTCAAC  
 C0213 MHN1-519 Notch1 AATCTGTAGTGCCTT  
 C0214 FIB504 integrinbeta7 TCCTTGGATGTACCG  
 C0215 11C1 CD268BAFF-R CGAAGTCGATCCGTA  
 C0216 HIP1 CD42b TCCTAGTACCGAAGT  
 C0217 HA58 CD54 CTGATAGACTTGAGT  
 C0218 AK4 CD62PP-Selectin CCTTCCGTATCCCTT  
 C0219 GIR-208 CD119IFNgammaRalphachain TGTGTATCCCTTGT  
 C0224 IP26 TCRalpha/beta CGTAACGTAGAGCGA  
 C0233 MHN3-21 Notch3 CTATTGGACGTATCT



C0236 RTK2071 RatIlgG1kappaisotypeCtrl ATCAGATGCCCTCAT  
C0238 RTK2758 RatIlgG2akappaisotypeCtrl AAGTCAGGTTCTGTTT  
C0241 HTK888 ArmenianHamsterIlgIsotypeCtrl CCTGTCATTAAGACT  
C0245 STA CD106 TCACAGTTCCTTGGA  
C0246 TU27 CD122IL-2Rbeta TCATTTCTCCGATT  
C0247 1A1 CD267TACI AGTGATGGAGCGAAC  
C0248 HAE-1f CD62E CTCCTGTGGCTTAA  
C0352 AER-37 (CRA-1) FcepsilonRIalpha CTCGTTTCCGTATCG  
C0353 HIP8 CD41 ACGTTGTGGCCTTGT  
C0355 4B4-1 CD1374-1BB CAGTAAGTTCGGGAC  
C0356 MIH24 CD254TRANCERANKL TCCGTGTTAGTTTGT  
C0358 GHI/61 CD163 GCTTCTCCTTCTTA  
C0359 HB15e CD83 CCACTCATTTCCGGT  
C0360 108-17 CD357GITR ACCTTTCGACACTCG  
C0363 G077F6 CD124IL-4Ralpha CCGTCTGATAGATG  
C0364 WM15 CD13 TTTCAACGCCCTTTC  
C0366 12G5 CD184CXCR4 TCAGGTCTTTCAAC  
C0367 TS1/8 CD2 TACGATTGTGACGG  
C0368 11A8 CD226DNAM-1 TCTCAGTGTTTGTGG  
C0369 TS2/16 CD29 GTATTCCCTCAGTCA  
C0370 201A CD303BDCA2 GAGATGTCCGAATTT  
C0371 P1E6-C5 CD49b GCTTTCTCAGTATG  
C0373 5A6 CD81TAPA-1 GTATCCTTCTTGGC  
C0374 MEM-108 CD98 GCACCAACAGCCATT  
C0375 M1310G05 IgGFc CTGGAGCGATTAGAA  
C0384 IA6-2 IgD CAGTCTCCGTAGAGT  
C0385 TS1/18 CD18 TATTGGGACACTTCT  
C0386 CD28.2 CD28 TGAGAACGACCCTAA  
C0387 1D3 TSLPRTSLP-R CAGTCCTCTCTGTCA  
C0389 HIT2 CD38 TGTACCCCGTTGTGA  
C0390 A019D5 CD127IL-7R GTGTGTTGCCTATG  
C0391 HI30 CD45 TGCAATTACCCGGAT  
C0393 S-HCL-1 CD22 GGGTTGTTGTCTTTG  
C0394 CY1G4 CD71 CCGTGTTCTCCTTA  
C0395 MIH43 B7-H4 TGTATGTCTGCCTTG  
C0396 BA5b CD26 GGTGGCTAGATAATG  
C0399 7C9C20 CD204 TAGCGAGCCAGATGT  
C0400 BV9 CD144VE-Cadherin TCCACTCATTCTGTA  
C0402 HI149 CD1a GATCGTGTGTGTTA  
C0406 12C2 CD304Neuropilin-1 GGAAGTTCGTT  
C0407 5-271 CD36 TTCTTTGCCTTGCCA  
C0420 HP-MA4 CD158KIR2DL1S1S3S5 TATCAACCAACGCTT  
C0433 8C11 CD325N-Cadherin CCTTCCCTTCTCTCT  
C0437 4C7 aCD207 CGATTTGTATCCCT  
C0575 TS2/7 CD49a ACTGATGGACTCAGA  
C0576 9F10 CD49d CCATTCAACTCCGG  
C0577 AD2 CD73 CAGTTCCTCAGTTCG  
C0581 3C10 TCRValpha72 TACGAGCAGTATTCA  
C0582 B6 TCRVdelta2 TCAGTCAGATGGTAT  
C0583 B3 TCRVgamma9 AAGTGATGGTATCTG  
C0584 6B11 TCRValpha24 AACTTCTGTGGTAGC  
C0590 NKTA255 CD305LAIR1 ATTTCCATTCCCTGT  
C0591 15C4 LOX-1 ACCCTTTACCGAATA  
C0592 DX27 CD158bKIR2DL2L3NKAT2 GACCCGTAGTTTGTAT  
C0597 9E9A8 CD209DC-SIGN TCACTGGACACTTAA  
C0599 DX9 CD158e1KIR3DL1NKB1 GGACGCTTTCCTTGA  
C0600 UP-R1 CD158fKIR2DL5 AAAGTGATGCCACTG  
C0801 P30-15 CD337NKp30 AAAGTCACTCTGCCG  
C0802 P44-8 CD336NKp44 GGGCAATTAGCGAGT  
C0828 413D12 CD307dFcRL4 CGATTTGATCTGCCT  
C0829 509f6 CD307eFcRL5 TCACGCAGTCCTCAA  
C0830 162.1 CD319CRACC AGTATGCCATGTCTT  
C0845 3B2/TA8 CD99 ACCCGTCCCTAAGAA  
C0853 50C1 CLEC12A CATTAGAGTCTGCCA  
C0863 1D6 CD257BAFFBLYS CAGAGCACCCATTAA  
C0864 NT-7 CD352NTB-A AGTTTCCACTCAGGC  
C0867 DX22 CD94 CTTTCCGGTCTTACA  
C0870 A12 (7D4) CD150SLAM GTCATTGTATGTCTG  
C0894 MHK-49 Iglighchainkappa AGCTCAGCCAGTATG  
C0895 M3/38 Mac-2 GATGCAATTAGCCGG  
C0896 GHI/75 CD85jILT2 CCTTGTGAGGCTATG  
C0897 EBVCS-5 CD23 TCTGTATAACCGTCT  
C0898 MHL-38 Iglighchainlambda CAGCCAGTAAGTCAC  
C0899 BB7.2 HLAA2 GAACATTTCCGACAA  
C0901 7B11 GARPLRRC32 AGGTATGGTAGAGTA  
C0902 6-434 CD328Siglec-7 CTTAGCATTTCACTG

C0908 H131 TCRVbeta131 TTATGGACGTATGGT  
 C0912 CG4 GPR56 GCCTAGTTCCGTTT  
 C0918 3D12 HLA-E GAGTCGAGAAATCAT  
 C0920 ASL-24 CD82 TCCCACTTCCGCTTT  
 C0944 BB27 CD101BB27 CTACTTCCCTGTCAA  
 C0985 17A12 CD360IL-21R GAGGATGATGCCATG  
 C1046 S5/1 CD88C5aR GCCGCATGAGAAACA  
 C1051 mAb 84 Podocalyxin GAGCCGGTATAATGC  
 C1052 KF29 CD224 CTGATGAGATGTCAG  
 C1056 T5-39 CD258LIGHT ACTTCCCTGTAGAAA  
 C1057 JD3 DR3TRAMP GAGTTCCTCAGTTC  
 C0956 APC-Streptavidin APC-Streptavidin GGTAActCTGGTAGC

## Validation

Unless specified otherwise, antibodies were purchased from Biolegend.

CD8-APCH7 (SK1, BD Biosciences, 561423): <https://www.bdbiosciences.com/en-us/products/reagents/flow-cytometry-reagents/research-reagents/single-color-antibodies-ruo/apc-h7-mouse-anti-human-cd8.561423>  
 CD4-BUV805 (SK3, BD Biosciences, 612887): <https://www.bdbiosciences.com/en-us/products/reagents/flow-cytometry-reagents/research-reagents/single-color-antibodies-ruo/buv805-mouse-anti-human-cd4.612887>  
 CD45RA-BUV395 (HI100, BD Biosciences, 740298): <https://www.bdbiosciences.com/en-us/products/reagents/flow-cytometry-reagents/research-reagents/single-color-antibodies-ruo/buv395-mouse-anti-human-cd45ra.740298>  
 CD45RO (UCHL1, 304234): <https://www.biolegend.com/en-us/products/brilliant-violet-785-anti-human-cd45ro-antibody-7973>  
 CD25-BV711 (M-A251, 356138): <https://www.biolegend.com/en-us/products/brilliant-violet-711-anti-human-cd25-antibody-13762>  
 CD62L-PE (DREG-56, 304840): <https://www.biolegend.com/en-us/products/pe-anti-human-cd62l-antibody-653?GroupID=BLG10034>  
 CD8-APC/Cy5.5 (RFT8, SouthernBiotech 9536-18): <https://www.southernbiotech.com/mouse-anti-human-cd8-apc-cy5-5-rft8-9536-18>  
 CD4-PE/Cy5.5 (RFT4, SouthernBiotech 9522-16): <https://www.southernbiotech.com/mouse-anti-human-cd4-pe-cy5-5-rft4-9522-16>  
 CD3-BV605 (OKT3, 317322): <https://www.biolegend.com/en-us/products/brilliant-violet-605-anti-human-cd3-antibody-7666>  
 CD19-APC (HIB19, 302212): <https://www.biolegend.com/en-us/products/apc-anti-human-cd19-antibody-715>  
 CD45RA-BUV395 (HI100, BD Biosciences, 740298): <https://www.bdbiosciences.com/en-us/products/reagents/flow-cytometry-reagents/research-reagents/single-color-antibodies-ruo/buv395-mouse-anti-human-cd45ra.740298>  
 CD45RO-BV785 (UCHL1, 304234): <https://www.biolegend.com/en-us/products/brilliant-violet-785-anti-human-cd45ro-antibody-7973?GroupID=GROUP658>  
 CD45-PECy7 (QA17A19, 393408): <https://www.biolegend.com/en-us/products/pe-cyanine7-anti-human-cd45-recombinant-antibody-16253>  
 TCR alpha/beta-BV421 (IP26, 306722): <https://www.biolegend.com/en-us/products/brilliant-violet-421-anti-human-tcr-alpha-beta-antibody-8526>

All antibodies were listed by the respective vendor as validated for flow cytometry.

Antibody validation information provided by Biolegend:

Antibody validation is a critical step in the journey towards obtaining consistent reproducibility in science. To ensure they are both specific and sensitive, we validate our antibodies through a variety of methods including:

Testing on multiple cell and tissue types with a variety of known expression levels.

Validation in multiple applications as a cross-check for specificity and to provide additional clarity for researchers.

Comparison to existing antibody clones.

Using cell treatments to modulate target expression, such as phosphatase treatment to ensure phospho-antibody specificity.

Antibody validation information provided by BD Biosciences:

Antibody specificity

BD Biosciences identifies key targets of interest in scientific research and develops its own specific antibodies or collaborates with top research scientists around the world to license their antibodies. We then transform these antibodies into flow cytometry reagents by conjugating them to a broad portfolio of high-performing dyes, including our vastly popular portfolio of BD Horizon Brilliant™ Dyes. A world-class team of research scientists helps ensure that these reagents work reliably and consistently for flow cytometry applications.

The specificity is confirmed using multiple methodologies that may include a combination of flow cytometry, immunofluorescence, immunohistochemistry or western blot to test staining on a combination of primary cells, cell lines or transfectant models.

All flow cytometry reagents are titrated on the relevant positive or negative cells. To save time and cell samples for researchers, test size reagents are bottled at an optimal concentration with the best signal-to-noise ratio on relevant models during the product development. To ensure consistent performance from lot-to-lot, each reagent is bottled to match the previous lot MFI.

Antibody validation information provided by Southern Biotech:

The success of any immunoassay hinges on the quality of the antibody reagents that are used. At SouthernBiotech, we produce all of our antibodies in-house and validate them with techniques including:

ELISA

FLISA

Flow cytometry

Western blot

Immunohistochemistry

Immunocytochemistry

Immunoprecipitation

By maintaining complete control over our antibody production workflow, we provide competitive pricing and next-day delivery, backed by fast and comprehensive technical support, giving you total confidence in your experimental results.

Validation information provided by Cell Signaling:

IKZF1 antibody: Ikaros (clone: D10E5) rabbit monoclonal antibody cat#9034: <https://www.cellsignal.com/products/primary-antibodies/ikaros-d10e5-rabbit-mab/9034>  
 beta-Actin  $\beta$ -Actin (8H10D10) mouse monoclonal antibody cat#3700: <https://www.cellsignal.com/products/primary-antibodies/b-actin-8h10d10-mouse-mab/3700>

Kindle Biosciences:  
 Digital anti mouse HRP (cat#: R1005): <https://kindlebio.com/products/29-digital-anti-mouse-hrp.html>

## Eukaryotic cell lines

Policy information about [cell lines and Sex and Gender in Research](#)

|                                                                   |                                                                                                                                                                                                                                                                                                    |
|-------------------------------------------------------------------|----------------------------------------------------------------------------------------------------------------------------------------------------------------------------------------------------------------------------------------------------------------------------------------------------|
| Cell line source(s)                                               | Lenti-X 293T cells were purchased from Takara (Cat#632180). Nalm6 cells were provided by Dr. Michael Milone, originally obtained from DSMZ. K562 cells were obtained from ATCC (CCL-243).                                                                                                          |
| Authentication                                                    | Nalm-6 cells were periodically authenticated by flow cytometry after staining with anti-CD19 antibody. Lenti-X 293T cell were not further authenticated since they were directly obtained from the vendor. K562 cells expressing CD64 were authenticated by staining for antibodies bound to CD64. |
| Mycoplasma contamination                                          | All cells were periodically tested for mycoplasma contamination. None of the cell lines were contaminated.                                                                                                                                                                                         |
| Commonly misidentified lines (See <a href="#">ICLAC</a> register) | No commonly misidentified cell lines were used in this study                                                                                                                                                                                                                                       |

## Animals and other research organisms

Policy information about [studies involving animals; ARRIVE guidelines](#) recommended for reporting animal research, and [Sex and Gender in Research](#)

|                         |                                                                                                                                                                                                                                            |
|-------------------------|--------------------------------------------------------------------------------------------------------------------------------------------------------------------------------------------------------------------------------------------|
| Laboratory animals      | NSG mice (male, 6-8 weeks) were provided by SCXC core at University of Pennsylvania. Mice were housed in a barrier facility with a 12 hour light-dark cycle at a temperature of 20-23 degrees Celsius with a humidity ranging from 30-70%. |
| Wild animals            | No wild animals were used in this study                                                                                                                                                                                                    |
| Reporting on sex        | Only male NSG mice were used in this study.                                                                                                                                                                                                |
| Field-collected samples | No field-collected samples were used in this study                                                                                                                                                                                         |
| Ethics oversight        | All studies involving animals were performed under a protocol approved by the University of Pennsylvania Institutional Animal Care and Use Committee.                                                                                      |

Note that full information on the approval of the study protocol must also be provided in the manuscript.

## Flow Cytometry

### Plots

Confirm that:

- The axis labels state the marker and fluorochrome used (e.g. CD4-FITC).
- The axis scales are clearly visible. Include numbers along axes only for bottom left plot of group (a 'group' is an analysis of identical markers).
- All plots are contour plots with outliers or pseudocolor plots.
- A numerical value for number of cells or percentage (with statistics) is provided.

### Methodology

|                           |                                                                                                                                                                                                                                                      |
|---------------------------|------------------------------------------------------------------------------------------------------------------------------------------------------------------------------------------------------------------------------------------------------|
| Sample preparation        | Sample preparation is described in the Methods.                                                                                                                                                                                                      |
| Instrument                | BD LSR II, Fortessa, or A3 Lite                                                                                                                                                                                                                      |
| Software                  | FlowJo (Tree Star, V10.8.1), BD FACSDiva software v8.0.1                                                                                                                                                                                             |
| Cell population abundance | Port-sort purity was performed by flow cytometry for one experiment and determined to be >85%.                                                                                                                                                       |
| Gating strategy           | Lymphocytes and singlets were gated as shown in Ext. Data. Fig 2f for all T cell experiments. For LIPSTIC assay experiments, LIPSTIC positivity was determined as greater than the signal of CAR T cells incubated without target. Cell division was |

determined by CTV dilution, with zero division signal determined by CTV-stained resting CAR T cells incubated without target.

Tick this box to confirm that a figure exemplifying the gating strategy is provided in the Supplementary Information.
